# Supplementary material
Source: PubMed Central journal article supplement (PMC4641525)

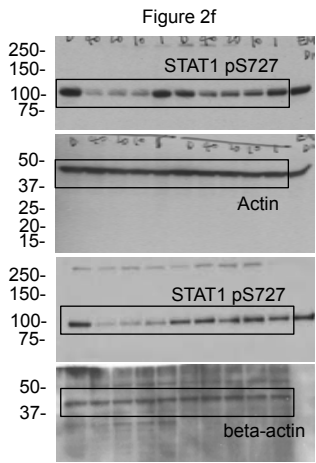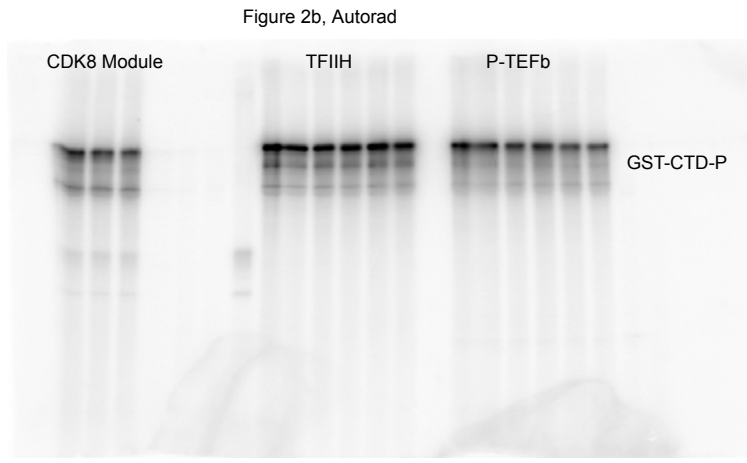

Extended Data Figure 2c

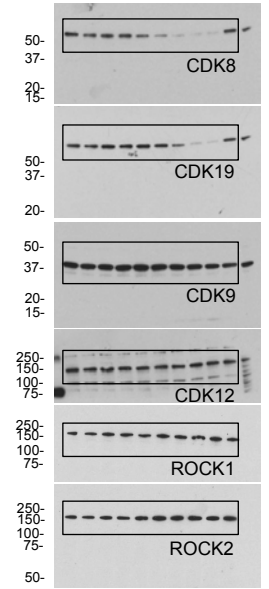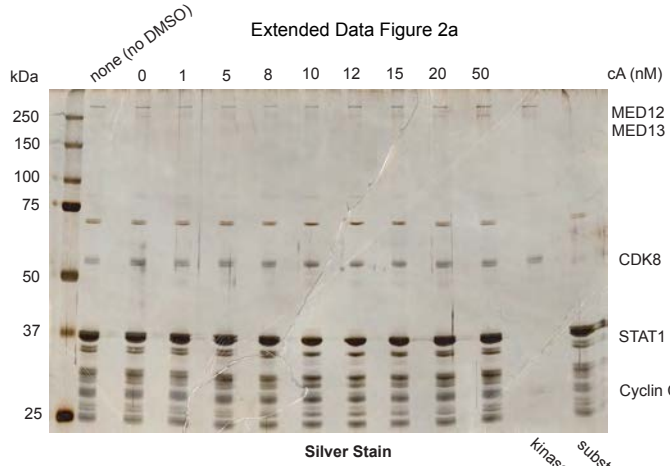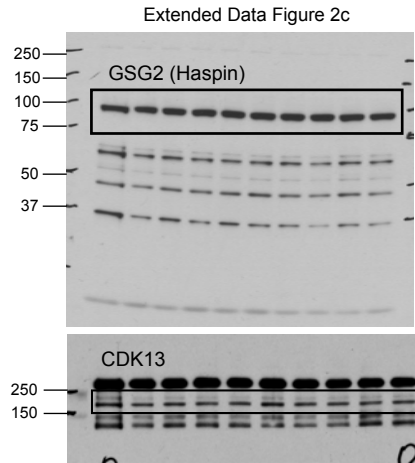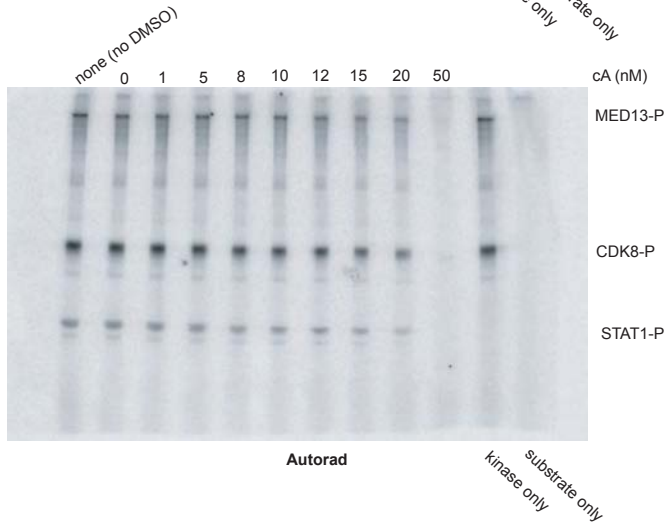

Extended Data Figure 4c

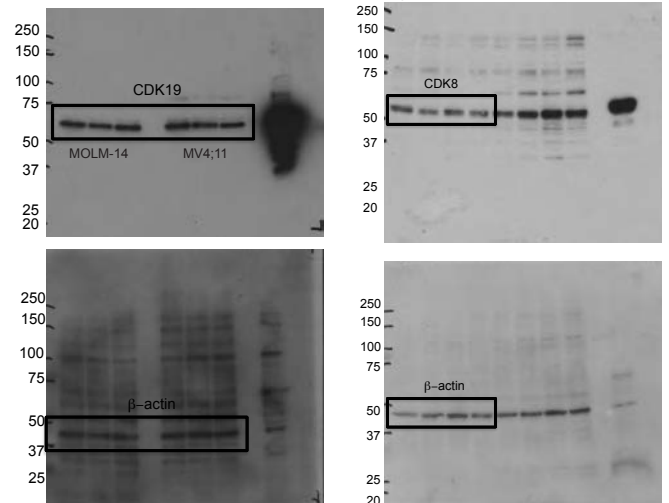

Extended Data Figure 2d

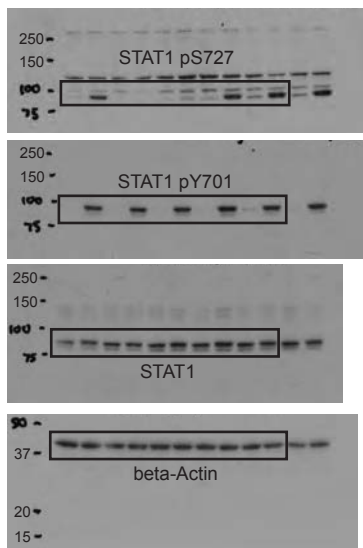

Extended Data Figure 2d

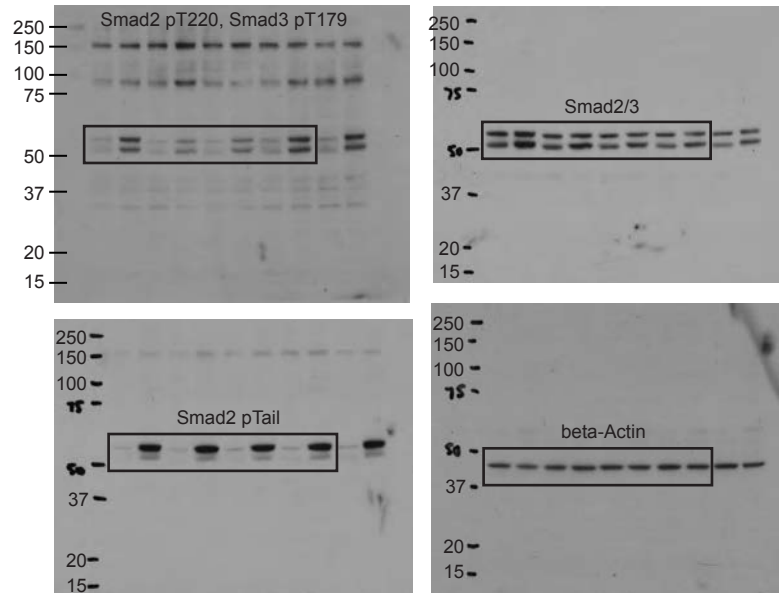

Extended Data Fig. 4b

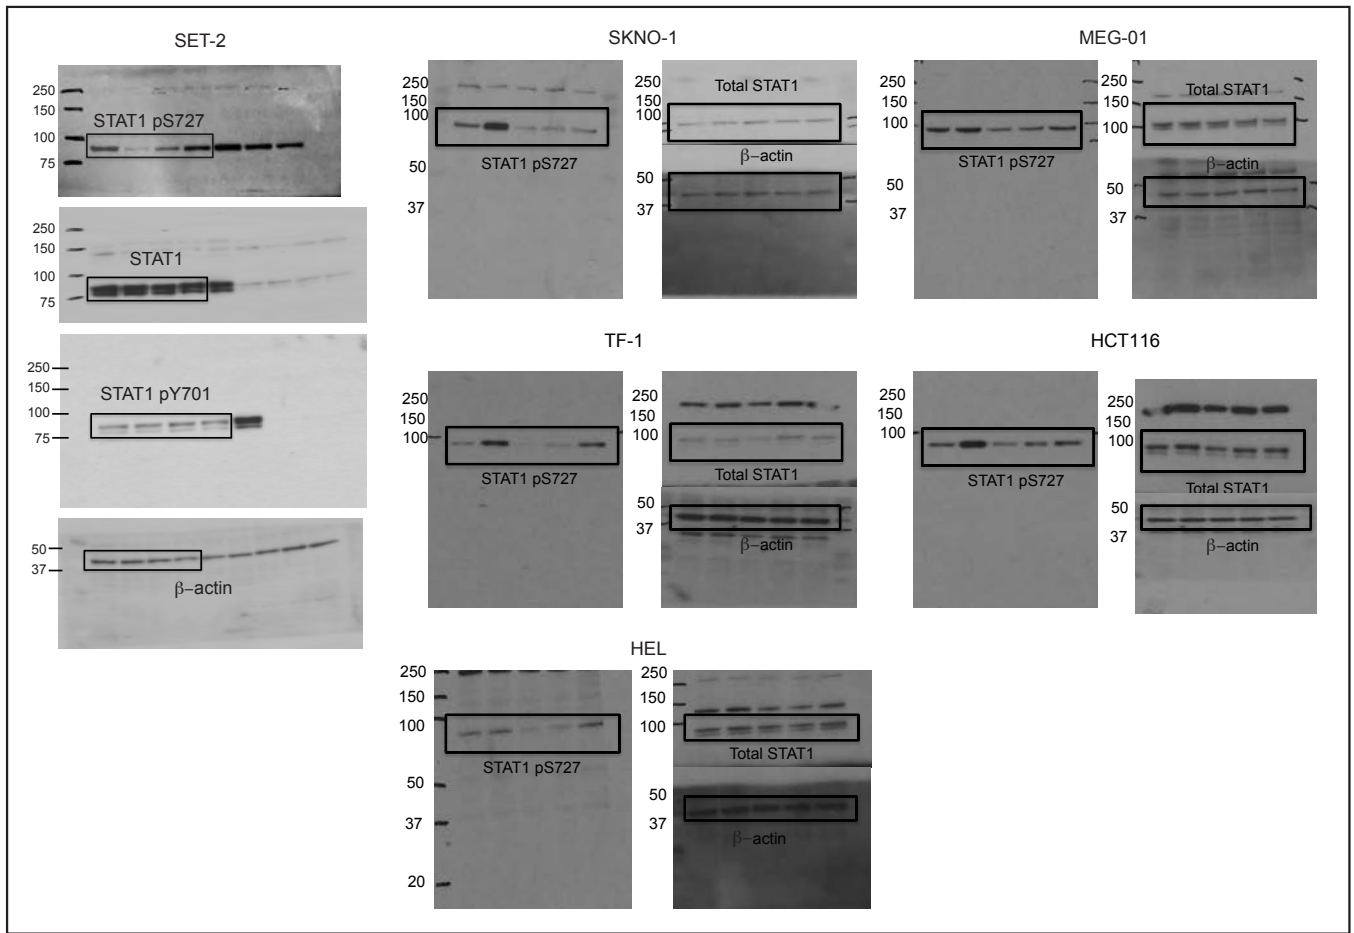

Extended Data Fig. 4f

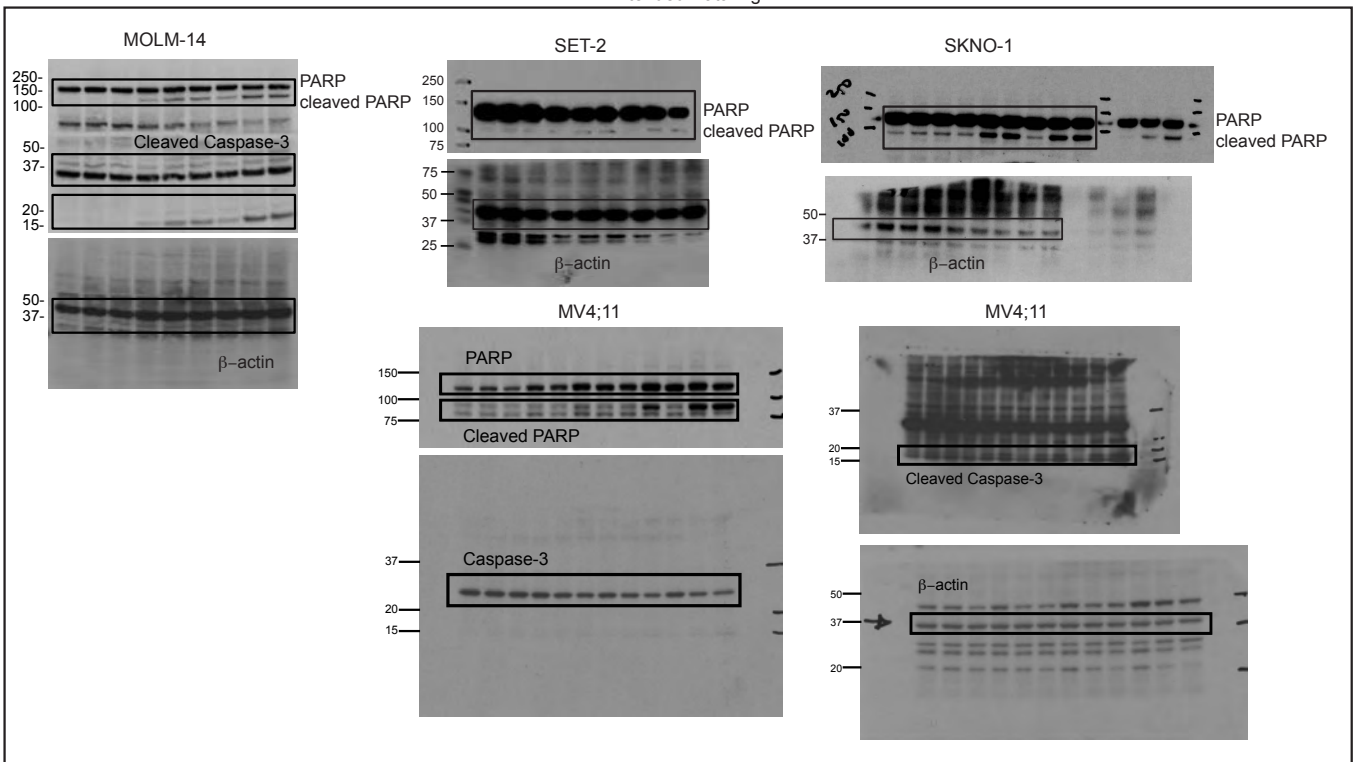

Extended Data Fig. 5b

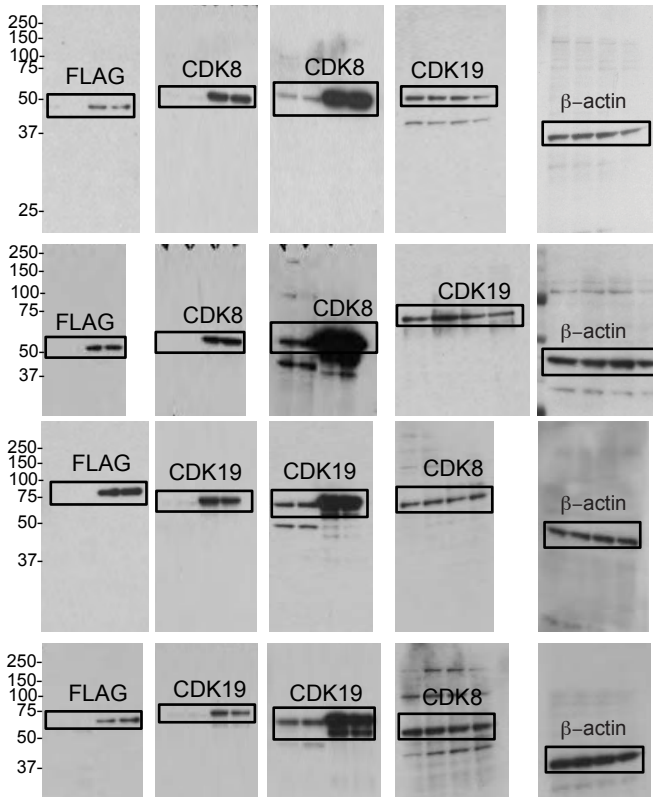

Extended Data Fig. 6h

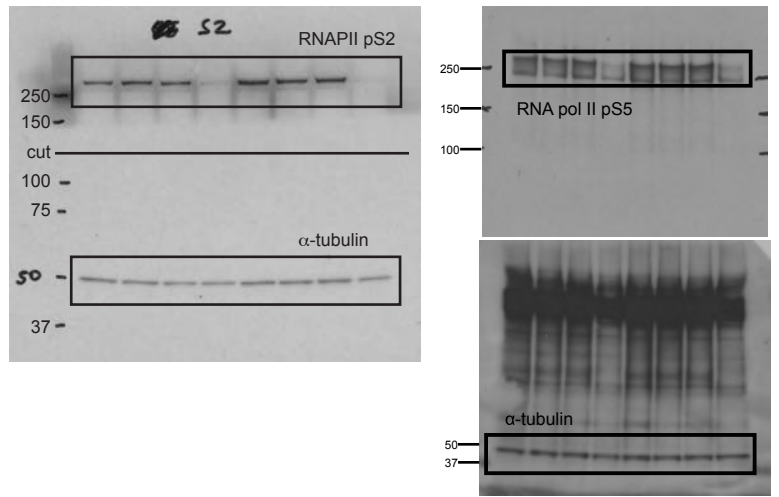

Extended Data Fig. 8i

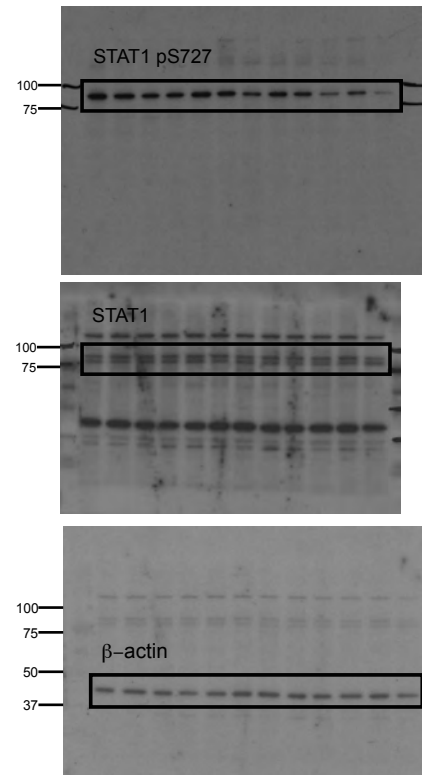

Extended Data Fig. 7e

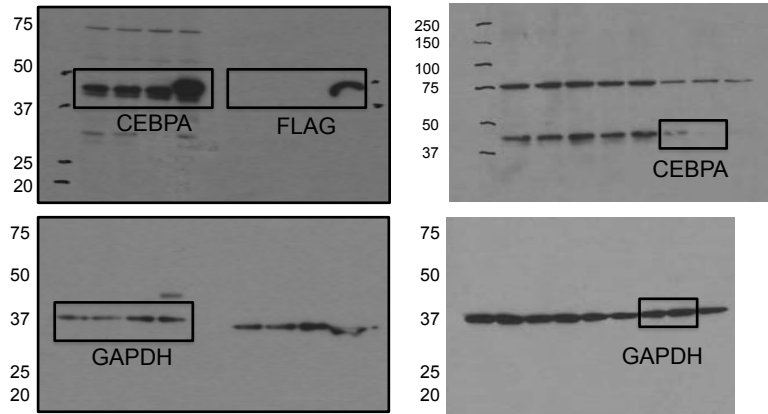

Supplement: NIHMS708320-supplement-2.pdf [file NIHMS708320-supplement-2.pdf]
